# Supplementary material for: Long-term results of the DelIVery for Pulmonary Arterial Hypertension trial
Source: PubMed Central journal article supplement — Pulm Circ. 2019 Nov 5;9(4):2045894019878615. doi: 10.1177/2045894019878615 (PMC6831973; doi:10.1177/2045894019878615), 2019-11-05
Supplement: PUL878615_Supplemetal_Material.pdf [file PUL878615_Supplemetal_Material.pdf]

List of Participating IRBs and Dates of Approval

| IRB                                                                                                                                                         | Date of IRB Approval           |
|-------------------------------------------------------------------------------------------------------------------------------------------------------------|--------------------------------|
| Western Institutional Review Board (WIRB)<br>Registration Number: IORG0000432                                                                               | 18 MAY 2011                    |
| Washington University in St. Louis Human<br>Research Protection Office<br>Registration Number: IORG0000101                                                  | 14 JUL 2012                    |
| St. Joseph's Hospital and Medical Center IRB<br>Registration Number: IORG0001540                                                                            | 09 FEB 2012                    |
| Mayo Clinic Institutional Review Board<br>Registration Number: IORG0000016                                                                                  | 08 JUN 2012                    |
| The University of Chicago Institutional Review<br>Board<br>Registration Number: IORG0000201                                                                 | 12 SEP 2011                    |
| VA Greater LA Healthcare System IRB<br>Registration Number: IORG0001133                                                                                     | 15 DEC 2010                    |
| Orlando Health IRB<br>Registration Number: IORG0000745<br>(Original Enrolling and Implanting Site)<br>Florida Hospital<br>Registration Number: IORG00002060 | 21 MAR 2012<br><br>09 AUG 2016 |
| The University of Texas (UT) Southwestern<br>Medical Center Institutional Review Board<br>Registration Number: IORG0000638                                  | 19 JUL 2011                    |
| Partners Human Research Committee<br>Registration Number: IORG0000046                                                                                       | 06 APR 2011                    |
| Aurora Health Care, Inc. IRB Registration<br>Number: IORG0000899                                                                                            | 01 FEB 2012                    |
